# Supplementary figures and images for: Initial characterization of a blue-light sensing, phototropin-related protein from Pseudomonas putida: a paradigm for an extended LOV construct
Source: Royal Society of Chemistry journal article supplement (doi:10.1039/b504554a), 2005-01-01

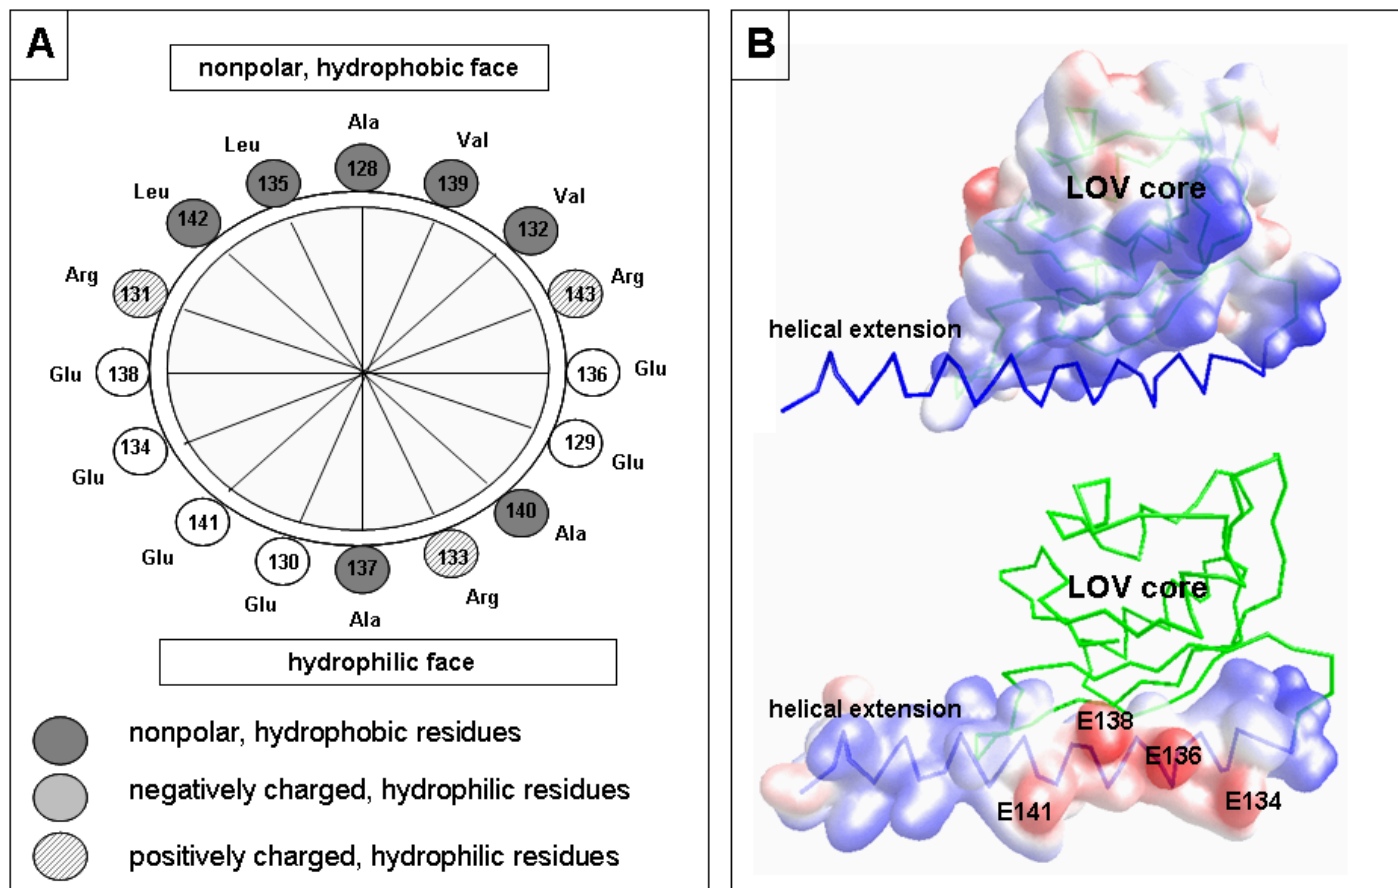

Figure 2

Supplement: b504554a.pdf [file b504554a.pdf]
